# Supplementary material for: Poly-quasi-eutectic solvents (PQESs): versatile solvents for dissolving metal oxides
Source: Royal Society of Chemistry journal article supplement (doi:10.1039/c9gc02604e), 2019-01-01
Supplement: c9gc02604e1.pdf [file c9gc02604e1.pdf]

## Electronic Supplementary Information

### **Poly-quasi-eutectic solvents (PQESs): versatile solvent for dissolving metal oxides**

Jingyun Jiang,<sup>a,b</sup> Xiyue Bai,<sup>a</sup> Xinhui Zhao,<sup>a</sup> Wenjun Chen,<sup>a</sup> Tingting Yu,<sup>a</sup> Yan Li,<sup>c</sup> and  
Tiancheng Mu<sup>\*a</sup>

<sup>a</sup>Department of Chemistry, Renmin University of China, Beijing 100872, China.

<sup>b</sup>School of Materials Science and Engineering, Zhengzhou University, Zhengzhou  
450001, Henan, China.

<sup>c</sup>College of Chemistry and Material Science, Shandong Agricultural University, Taian  
271018, Shandong, China

\*Corresponding author. Tel: 86-10-62514925, Email: [tcmu@ruc.edu.cn](mailto:tcmu@ruc.edu.cn)

# Contents

**Table S1** The onset melting temperature ( $T_m$ ) of PQESs. <sup>a</sup> means no data.

**Table S2** Temperature dependent viscosity of PQESs. <sup>a</sup> means no data.

**Table S3** Temperature dependent conductivity of PQESs. <sup>a</sup> means no data.

**Table S4** Energy for activation of viscous flow  $E_\eta$  and conductivity  $E_\Lambda$  obtained by fitting the data in Figure S3 to equation 1 and those in Figure S4 to equation 2.

**Table S5** Comparison of solubility of 7 metal oxides in our PEG-based PQESs and other reported ionic liquids. <sup>a</sup>[P<sub>66614</sub>][Cl]: trihexyl(tetradecyl)phosphonium chloride; <sup>b</sup>[C<sub>2</sub>mim][Cl]: 1-ethyl-3-methylimidazolium chloride; <sup>c</sup>[C<sub>2</sub>mim][OAc]: 1-ethyl-3-methylimidazolium acetate; <sup>d</sup> means no data.

**Table S6** The solvatochromic parameters of PEG-based PQESs.

**Table S7** The adjusted  $R^2$  of solubility of Fe<sub>2</sub>O<sub>3</sub>, CoO, NiO, CuO, ZnO, Al<sub>2</sub>O<sub>3</sub>, and ZnO vs  $\alpha$ ,  $T_m$ , viscosity, and conductivity values of different PEG-based PQESs.

**Table S8** Symmetric vibrations ( $\nu_s(\text{COO}^-)$ ), antisymmetric stretching vibrations, ( $\nu_{as}(\text{COO}^-)$ ), and distance between them of carboxylic acid-based PQESs after dissolving metal oxides.

**Table S9**  $pK_a$  values of the selected carboxyl acid-based HBDs.

**Fig. S1** Structures of the selected 11 hydrogen bonding donors (HBDs): 2-fluoric acid, oxalic acid, malonic acid, succinic acid, and glutaric acid, acetamide, urea, N-methylurea, thiourea, N-methylthiourea, and N,N-dimethylthiourea.

**Fig. S2** FTIR spectra of the P123-based PQESs: (a) P123-based PQESs composed by amides-based HBDs including acetamide, urea, N-methylurea, thiourea, N-methylthiourea, and N,N-dimethylthiourea; (b) P123-based PQESs composed by amides-based HBDs including 2-fluoric acid, oxalic acid, malonic acid, succinic acid, and glutaric acid.

**Fig. S3** Plot of  $\ln$  viscosity vs. reciprocal of temperature for a variety of PQESs: (a) amides-based HBDs including acetamide, urea, N-methylurea, thiourea, N-methylthiourea, and N,N-dimethylthiourea; (b) carboxylic acid-based HBDs including 2-fluoric acid, oxalic acid, malonic acid, succinic acid, and glutaric acid.

**Fig. S4** Plot of  $\ln$  conductivity vs. reciprocal of temperature for a variety of PQESs: (a) amides-based HBDs including acetamide, urea, N-methylurea, thiourea, N-methylthiourea, and N,N-dimethylthiourea; (b) carboxylic acid-based HBDs including 2-fluoric acid, oxalic acid, malonic acid, succinic acid, and glutaric acid.

**Fig. S5** Plot of conductivity vs. reciprocal of viscosity for a variety of PQESs: (a) amides-based HBDs including acetamide, urea, N-methylurea, thiourea, N-methylthiourea, and N,N-dimethylthiourea; (b) carboxylic acid-based HBDs including

2-fluoric acid, oxalic acid, malonic acid, succinic acid, and glutaric acid.

**Fig. S6 The thermal stability of the prepared PEG-based PQESs.**

**Fig. S7 The dissolving of  $\text{Fe}_2\text{O}_3$  in the synthesized PQESs:** (a) Photographs of PQESs after dissolving  $\text{Fe}_2\text{O}_3$ ; (b) solubility of  $\text{Fe}_2\text{O}_3$  in different PQESs. The HBDs were composed by acetamide (I), urea (II), N-methylurea (III), thiourea (IV), N-methylthiourea (V), and N,N-dimethylthiourea (VI), 2-furoic acid (VII), oxalic acid (VIII), malonic acid (IX), succinic acid (X), and glutaric acid (XI).

**Fig. S8 The dissolving of  $\text{CoO}$  in the synthesized PQESs:** (a) Photographs of PQESs after dissolving  $\text{CoO}$ ; (b) solubility of  $\text{CoO}$  in different PQESs. The HBDs were composed by acetamide (I), urea (II), N-methylurea (III), thiourea (IV), N-methylthiourea (V), and N,N-dimethylthiourea (VI), 2-furoic acid (VII), oxalic acid (VIII), malonic acid (IX), succinic acid (X), and glutaric acid (XI).

**Fig. S9 The dissolving of  $\text{NiO}$  in the synthesized PQESs:** (a) Photographs of PQESs after dissolving  $\text{NiO}$ ; (b) solubility of  $\text{NiO}$  in different PQESs. The HBDs were composed by acetamide (I), urea (II), N-methylurea (III), thiourea (IV), N-methylthiourea (V), and N,N-dimethylthiourea (VI), 2-furoic acid (VII), oxalic acid (VIII), malonic acid (IX), succinic acid (X), and glutaric acid (XI).

**Fig. S10 The dissolving of  $\text{CuO}$  in the synthesized PQESs:** (a) Photographs of PQESs after dissolving  $\text{CuO}$ ; (b) solubility of  $\text{CuO}$  in different PQESs. The HBDs were composed by acetamide (I), urea (II), N-methylurea (III), thiourea (IV), N-methylthiourea (V), and N,N-dimethylthiourea (VI), 2-furoic acid (VII), oxalic acid (VIII), malonic acid (IX), succinic acid (X), and glutaric acid (XI).

**Fig. S11 The dissolving of  $\text{ZnO}$  in the synthesized PQESs:** (a) Photographs of PQESs after dissolving  $\text{ZnO}$ ; (b) solubility of  $\text{ZnO}$  in different PQESs. The HBDs were composed by acetamide (I), urea (II), N-methylurea (III), thiourea (IV), N-methylthiourea (V), and N,N-dimethylthiourea (VI), 2-furoic acid (VII), oxalic acid (VIII), malonic acid (IX), succinic acid (X), and glutaric acid (XI).

**Fig. S12 The dissolving of  $\text{Al}_2\text{O}_3$  in the synthesized PQESs:** (a) Photographs of PQESs after dissolving  $\text{Al}_2\text{O}_3$ ; (b) solubility of  $\text{Al}_2\text{O}_3$  in different PQESs. The HBDs were composed by acetamide (I), urea (II), N-methylurea (III), thiourea (IV), N-methylthiourea (V), and N,N-dimethylthiourea (VI), 2-furoic acid (VII), oxalic acid (VIII), malonic acid (IX), succinic acid (X), and glutaric acid (XI).

**Fig. S13 The dissolving of  $\text{CaO}$  in the synthesized PQESs:** (a) Photographs of PQESs after dissolving  $\text{CaO}$ ; (b) solubility of  $\text{CaO}$  in different PQESs. The HBDs were composed by acetamide (I), urea (II), N-methylurea (III), thiourea (IV), N-methylthiourea (V), and N,N-dimethylthiourea (VI), 2-furoic acid (VII), oxalic acid (VIII), malonic acid (IX), succinic acid (X), and glutaric acid (XI).

**Fig. S14 Relationship of metal oxides ( $\text{Fe}_2\text{O}_3$ ,  $\text{CoO}$ ,  $\text{NiO}$ ,  $\text{CuO}$ ,  $\text{ZnO}$ ,  $\text{Al}_2\text{O}_3$ , and  $\text{CaO}$ ) solubility vs  $\alpha$  value for PEG-based PQESs.** The lines are the linear fitting results of the solubility vs  $\alpha$  value.

**Fig. S15 Relationship of metal oxides (Fe<sub>2</sub>O<sub>3</sub>, CoO, NiO, CuO, ZnO, Al<sub>2</sub>O<sub>3</sub>, and CaO) solubility vs  $T_m$  (a), viscosity (b), and conductivity (c) values for PEG-based PQESs. The lines are the linear fitting results of the solubility vs  $T_m$  (a), viscosity (b), and conductivity (c) values.**

**Fig. 16 TEM images of ZnO dissolved in 2-furonic acid-PEG at low (a) and high (b) magnification.**

**Fig. S17 <sup>1</sup>H NMR spectra of before (black) and after (red) metal oxides dissolved in the synthesized PQESs: (a) CaO in 2-furoic acid-PEG and (b) CuO in thiourea-PEG.**

**Reference**

**Table S1** The onset melting temperature ( $T_m$ ) of PQESs. <sup>a</sup> means no data. <sup>b</sup> means the data was derived from reference 1.

| PQESs<br>HBDs        | $T_m$ (°C)         |             |              |                            |                |
|----------------------|--------------------|-------------|--------------|----------------------------|----------------|
|                      | PEG<br>200         | PEG<br>1000 | P123<br>5800 | PPG-NH <sub>2</sub><br>250 | DMPEG<br>D-230 |
| 2-furoic acid        | -71.8              | 29.8        | 27.2         | -93.0                      | -70.2          |
| oxalic acid          | -66.9              | 30.4        | 26.8         | -85.8                      | -67.2<br>_a    |
| malonic acid         | -69.2              | 29.2        | 28.6         | -89.9                      | _a             |
| succinic acid        | -73.2              | 29          | 27.5         | -90.1                      | _a             |
| glutaric acid        | -76.7              | 27.8        | 26.9         | -90.4                      |                |
| acetamide            | -78.6              | 31.2        | 26.9         | -95.2                      | -73.3          |
| urea                 | -64.2              | 32.4        | 29.6         | -94.3                      | -57.8          |
| N-methylurea         | -70.8              | 31.2        | 27.6         | -96.2                      | -73.4          |
| thiourea             | -65.1 <sup>b</sup> | 29.6        | 27.6         | -89.7                      | -64.0          |
| N-methylthiourea     | -67.6              | 29.4        | 26.5         | -91.2                      | -62.5          |
| N,N-dimethylthiourea | -75.6              | 29.3        | 25.7         | -93.2                      | -59.8          |

**Table S2** Temperature dependent viscosity of PQESs. <sup>a</sup> means no data.

| PQESs<br>HBDs        | $\eta$ (mPa·s)  |        |        |        |        |        |        |                |
|----------------------|-----------------|--------|--------|--------|--------|--------|--------|----------------|
|                      | Temperature (K) |        |        |        |        |        |        |                |
|                      | 298.15          | 308.15 | 318.15 | 328.15 | 338.15 | 348.15 | 358.15 | 368.15         |
| 2-furoic acid        | 87.3            | 48.8   | 30.0   | 19.8   | 13.8   | 10.3   | 7.74   | 5.99           |
| oxalic acid          | 123             | 86.2   | 50.7   | 32.9   | 22.3   | 15.9   | 11.8   | - <sup>a</sup> |
| malonic acid         | 118             | 65.1   | 39.1   | 25.3   | 17.4   | 12.7   | 9.69   | 7.87           |
| succinic acid        | 95.2            | 54.5   | 33.9   | 22.5   | 15.8   | 11.6   | 8.88   | 7.01           |
| glutaric acid        | 92.7            | 56.5   | 34.8   | 24.8   | 16.7   | 12.0   | 8.96   | 6.30           |
| acetamide            | 46.1            | 27.8   | 18.6   | 12.9   | 9.41   | 7.11   | 5.46   | 3.95           |
| urea                 | 114             | 60.2   | 35.4   | 22.8   | 15.6   | 11.3   | 8.57   | 6.77           |
| N-methylurea         | 74.5            | 42.4   | 26.2   | 17.6   | 12.5   | 9.21   | 7.19   | 5.67           |
| thiourea             | 170             | 72.6   | 41.5   | 25.9   | 17.5   | 12.8   | 9.41   | 7.21           |
| N-methylthiourea     | 118             | 66.5   | 37.6   | 26.3   | 16.6   | 11.6   | 8.51   | 5.60           |
| N,N-dimethylthiourea | 59.6            | 34.1   | 21.8   | 14.8   | 10.5   | 7.85   | 6.01   | 4.18           |

**Table S3** Temperature dependent conductivity of PQESs. <sup>a</sup> means no data.

| PQESs<br>HBDs        | $\sigma$ ( $\mu\text{S}\cdot\text{cm}^{-1}$ ) |        |        |        |        |        |                |                |
|----------------------|-----------------------------------------------|--------|--------|--------|--------|--------|----------------|----------------|
|                      | Temperature (K)                               |        |        |        |        |        |                |                |
|                      | 298.15                                        | 308.15 | 318.15 | 328.15 | 338.15 | 348.15 | 358.15         | 368.15         |
| 2-furoic acid        | 4.21                                          | 5.59   | 7.70   | 10.1   | 13.0   | 15.7   | 18.1           | 21.1           |
| oxalic acid          | 5.44                                          | 7.95   | 10.4   | 13.4   | 16.6   | 20.0   | - <sup>a</sup> | - <sup>a</sup> |
| malonic acid         | 1.21                                          | 1.57   | 2.01   | 2.66   | 3.40   | 4.36   | 5.16           | 5.97           |
| succinic acid        | 1.11                                          | 1.36   | 1.90   | 2.50   | 3.16   | 3.99   | 4.69           | 5.58           |
| glutaric acid        | 4.24                                          | 6.39   | 9.14   | 11.4   | 14.4   | 18.1   | 20.9           | 24.5           |
| acetamide            | 5.16                                          | 6.87   | 9.28   | 11.3   | 14.1   | 17.1   | 19.5           | 22.8           |
| urea                 | 2.78                                          | 4.08   | 5.91   | 7.99   | 10.2   | 13.8   | 18.0           | 25.1           |
| N-methylurea         | 10.1                                          | 13.1   | 20.2   | 26.6   | 34.2   | 41.6   | 48.9           | 62.6           |
| thiourea             | 2.72                                          | 3.40   | 4.73   | 6.91   | 9.28   | 12.2   | 14.7           | 18.3           |
| N-methylthiourea     | 4.20                                          | 7.21   | 10.0   | 13.7   | 18.8   | 25.4   | 35.0           | 43.8           |
| N,N-dimethylthiourea | 4.33                                          | 6.41   | 10.0   | 13.8   | 18.1   | 24.8   | 32.7           | 44             |

**Table S4** Energy for activation of viscous flow  $E_\eta$  and conductivity  $E_\Lambda$  obtained by fitting the data in Figure S3 to equation 1 and those in Figure S4 to equation 2.

| PQESs<br>HBDs        | $\ln \eta_0$ | $E_\eta$<br>kJ·mol <sup>-1</sup> | $\ln \sigma_0$ | $E_\sigma$<br>kJ·mol <sup>-1</sup> |
|----------------------|--------------|----------------------------------|----------------|------------------------------------|
| 2-furoic acid        | -9.57±0.4    | 34.5±1.1                         | 10.1±0.1       | -21.6±0.5                          |
| oxalic acid          | -9.21±0.2    | 34.8±0.7                         | 10.7±0.2       | -22.1±0.6                          |
| malonic acid         | -9.32±0.3    | 34.5±2.0                         | 10.3±0.3       | -25.8±0.9                          |
| succinic acid        | -9.20±0.4    | 33.8±1.1                         | 9.00±0.1       | -22.1±0.4                          |
| glutaric acid        | -9.42±0.3    | 34.4±0.9                         | 10.5±0.2       | -22.2±0.6                          |
| acetamide            | -8.85±0.3    | 31.2±0.8                         | 9.40±0.1       | -19.0±0.3                          |
| urea                 | -10.1±0.5    | 36.5±1.5                         | 12.2±0.2       | -27.8±0.3                          |
| methylurea           | -9.24±0.4    | 33.3±1.2                         | 11.8±0.2       | -23.6±0.6                          |
| thiourea             | -12.9±0.4    | 40.3±1.1                         | 11.3±0.1       | -25.8±0.4                          |
| N-methylthiourea     | -10.9±0.3    | 38.9±1.0                         | 13.5±0.1       | -29.8±0.4                          |
| N,N-dimethylthiourea | -9.57±0.4    | 33.6±1.1                         | 13.6±0.2       | -30.1±0.4                          |



**Table S5** Comparison of solubility of 7 metal oxides in our PEG-based PQESs and other reported ionic liquids. <sup>a</sup>[P<sub>66614</sub>][Cl]: trihexyl(tetradecyl)phosphonium chloride; <sup>b</sup>[C<sub>2</sub>mim][Cl]: 1-ethyl-3-methylimidazolium chloride; <sup>c</sup>[C<sub>2</sub>mim][OAc]: 1-ethyl-3-methylimidazolium acetate; -<sup>d</sup> means no data.

| PQESs<br>HBDs                              | Solubility (ppm unless stated otherwise) |                |                |             |                |                                |                | Reference |
|--------------------------------------------|------------------------------------------|----------------|----------------|-------------|----------------|--------------------------------|----------------|-----------|
|                                            | Fe <sub>2</sub> O <sub>3</sub>           | CoO            | NiO            | CuO         | ZnO            | Al <sub>2</sub> O <sub>3</sub> | CaO            |           |
| 2-furoic acid                              | 123                                      | 1995           | 143            | 818         | <b>18139</b>   | 218                            | <b>3170</b>    | our work  |
| oxalic acid-PEG                            | <b>1763</b>                              | - <sup>d</sup> | - <sup>d</sup> | 1.8         | - <sup>d</sup> | <b>324</b>                     | 155            | our work  |
| thiourea-PEG                               | - <sup>d</sup>                           | 370            | 45.8           | <b>1303</b> | 181            | 261                            | 1024           | our work  |
| ChCl-malonic acid                          | 376                                      | 3626           | 151            | 14008       | 16217          | - <sup>d</sup>                 | - <sup>d</sup> | [2]       |
| ChCl-urea                                  | 49                                       | -              | 325            | 470         | 8466           | <1                             | 6              | [3]       |
| <sup>a</sup> [P <sub>66614</sub> ][Cl]-HCl | 647                                      | 993            | 996            | 1035        | 1041           | - <sup>d</sup>                 | 698            | [4]       |
| <sup>b</sup> [C <sub>2</sub> mim][Cl]      | - <sup>d</sup>                           | - <sup>d</sup> | 5 mg/g         | 64 mg/g     | 36 mg/g        | - <sup>d</sup>                 | - <sup>d</sup> | [5]       |
| <sup>c</sup> [C <sub>2</sub> mim][OAc]     | - <sup>d</sup>                           | - <sup>d</sup> | 0.9 mg/g       | 2.3 mg/g    | 83 mg/g        | - <sup>d</sup>                 | - <sup>d</sup> | [5]       |

**Table S6** The solvatochromic parameters of PEG-based PQESs.

| PQESs                    | $\alpha$ | $\beta$ | $\pi^*$ |
|--------------------------|----------|---------|---------|
| 2-furoic acid-PEG        | 2.9694   | 0.7584  | 0.9433  |
| oxalic acid-PEG          | 3.4820   | 1.4406  | 0.8497  |
| malonic acid-PEG         | 3.0940   | 1.1118  | 0.9053  |
| succinic acid-PEG        | 2.7790   | 1.4080  | 0.9053  |
| glutaric acid-PEG        | 2.8421   | 1.1685  | 0.8881  |
| acetamide-PEG            | 2.5653   | 1.8427  | 0.9640  |
| urea-PEG                 | 2.6539   | 1.8552  | 1.0013  |
| N-methylurea-PEG         | 2.5566   | 1.9783  | 0.9640  |
| thiourea-PEG             | 2.6828   | 1.5976  | 1.0383  |
| N-methylthiourea-PEG     | 2.7722   | 1.5757  | 1.0013  |
| N,N-dimethylthiourea-PEG | 2.7134   | 1.6989  | 0.9640  |

**Table S7** The adjusted R<sup>2</sup> of solubility of Fe<sub>2</sub>O<sub>3</sub>, CoO, NiO, CuO, ZnO, Al<sub>2</sub>O<sub>3</sub>, and ZnO vs  $\alpha$ ,  $T_m$ , viscosity, and conductivity values of different PEG-based PQESs.

| Metal oxides in<br>PEG-based PQESs | Adjusted R <sup>2</sup> |        |           |              |
|------------------------------------|-------------------------|--------|-----------|--------------|
|                                    | $\alpha$                | $T_m$  | Viscosity | Conductivity |
| Fe <sub>2</sub> O <sub>3</sub>     | 0.6268                  | 0.3591 | 0.2789    | 0.0016       |
| CoO                                | 0.4032                  | 0.0013 | 0.1396    | 0.0219       |
| NiO                                | 0.4379                  | 0.1091 | 0.0001    | 0.0053       |
| CuO                                | 0.6215                  | 0.0062 | 0.0001    | 0.0024       |
| ZnO                                | 0.0870                  | 0.0303 | 0.0002    | 0.1678       |
| Al <sub>2</sub> O <sub>3</sub>     | 0.1768                  | 0.6837 | 0.4194    | 0.0022       |
| CaO                                | 0.0193                  | 0.0073 | 0.0194    | 0.0477       |

**Table S8** Symmetric vibrations( $\nu_s(\text{COO}^-)$ ), antisymmetric stretching vibrations, ( $\nu_{as}(\text{COO}^-)$ ), and distance between them of carboxylic acid-based PQESs after dissolving metal oxides.

| <b>Metal oxides dissolving in PQESs</b>                | <b><math>\nu_{as}(\text{COO}^-)</math></b> | <b><math>\nu_s(\text{COO}^-)</math></b> | <b><math>\nu_{as}(\text{COO}^-)-\nu_s(\text{COO}^-)</math></b> |
|--------------------------------------------------------|--------------------------------------------|-----------------------------------------|----------------------------------------------------------------|
|                                                        | <b><math>\text{cm}^{-1}</math></b>         | <b><math>\text{cm}^{-1}</math></b>      | <b><math>\text{cm}^{-1}</math></b>                             |
| Fe <sub>2</sub> O <sub>3</sub> in oxalic acid-PEG      | 1743                                       | 1456                                    | 287                                                            |
| CoO in 2-furoic acid-PEG PQES                          | 1713                                       | 1474                                    | 239                                                            |
| NiO in malonic acid-PEG PQES                           | 1737                                       | 1459                                    | 278                                                            |
| ZnO in 2-furoic acid-PEG                               | 1734                                       | 1477                                    | 257                                                            |
| Al <sub>2</sub> O <sub>3</sub> in oxalic acid-PEG PQES | 1740                                       | 1456                                    | 284                                                            |
| CaO in 2-furoic acid-PEG                               | 1722                                       | 1477                                    | 245                                                            |

**Table S9**  $pK_a$  values of the selected carboxyl acid-based HBDs.

| <b>Carboxyl acid-based HBDs</b> | <b><math>pK_{a1}</math></b> | <b><math>pK_{a2}</math></b> |
|---------------------------------|-----------------------------|-----------------------------|
| 2-furoic acid                   | 3.16                        | - <sup>a</sup>              |
| oxalic acid                     | 1.27                        | 4.27                        |
| malonic acid                    | 2.85                        | 5.66                        |
| succinic acid                   | 4.21                        | 5.64                        |
| glutaric acid                   | 3.77                        | 6.08                        |

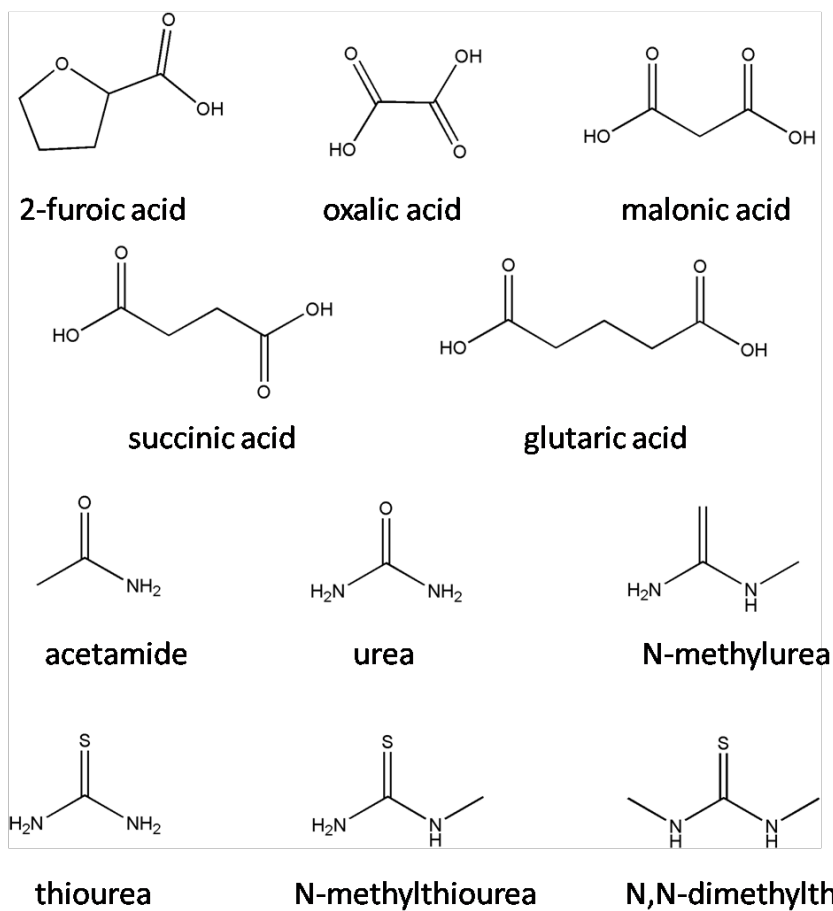

**Fig. S1** Structures of the selected 11 hydrogen bonding donors (HBDs): 2-furoic acid, oxalic acid, malonic acid, succinic acid, and glutaric acid, acetamide, urea, N-methylurea, thiourea, N-methylthiourea, and N,N-dimethylthiourea.

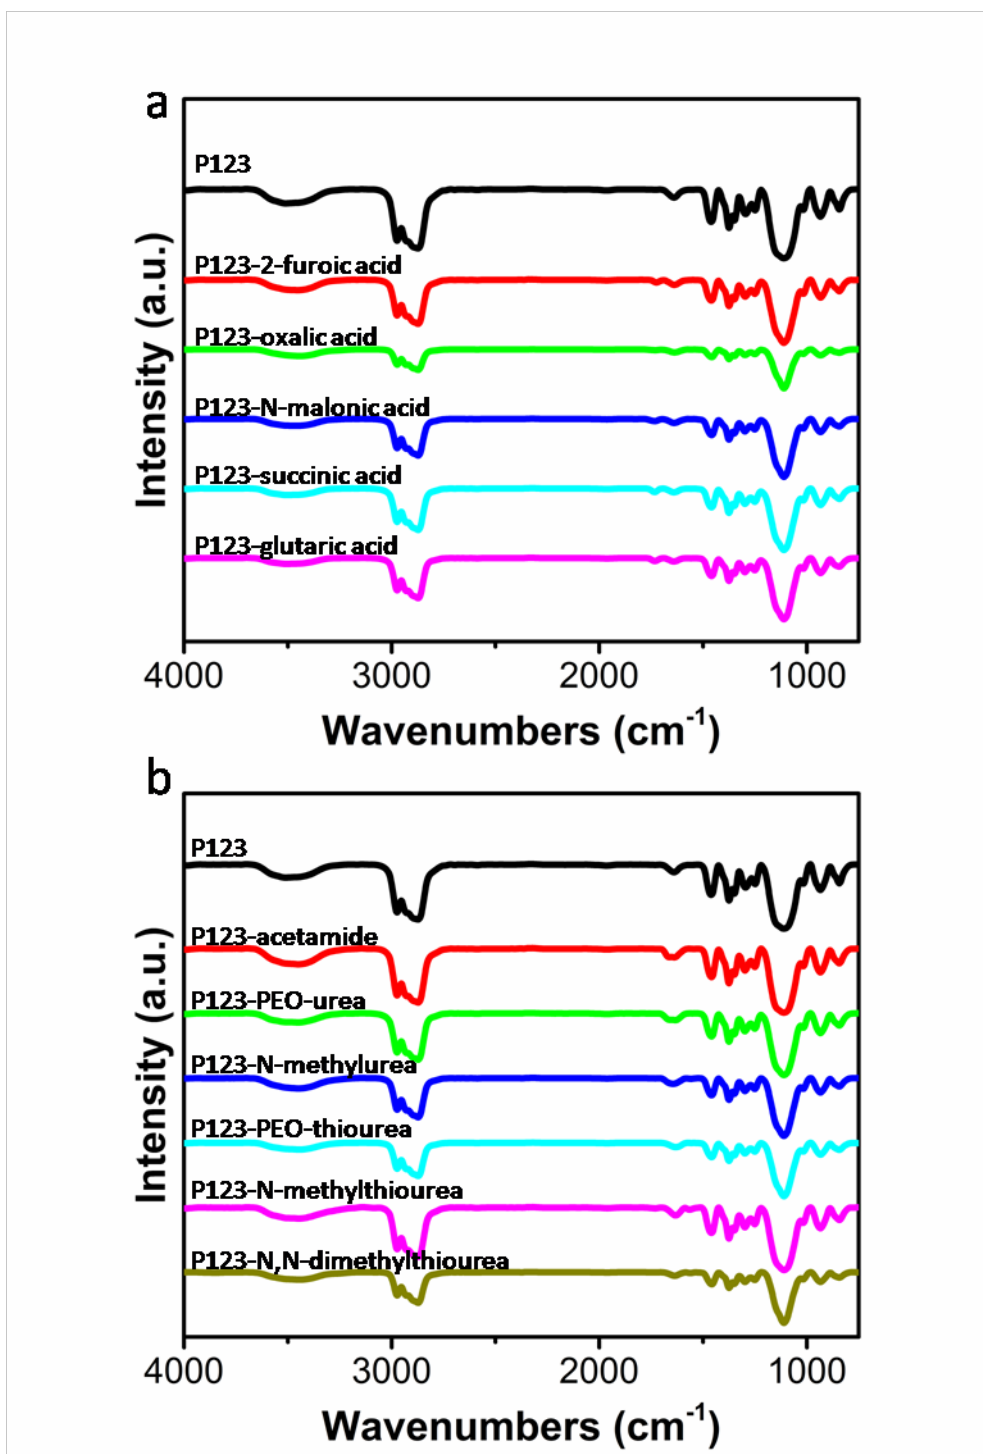

**Fig. S2** FTIR spectra of the P123-based PQESs: (a) P123-based PQESs composed by amides-based HBDs including acetamide, urea, N-methylurea, thiourea, N-methylthiourea, and N,N-dimethylthiourea; (b) P123-based PQESs composed by amides-based HBDs including 2-furoic acid, oxalic acid, malonic acid, succinic acid, and glutaric acid.

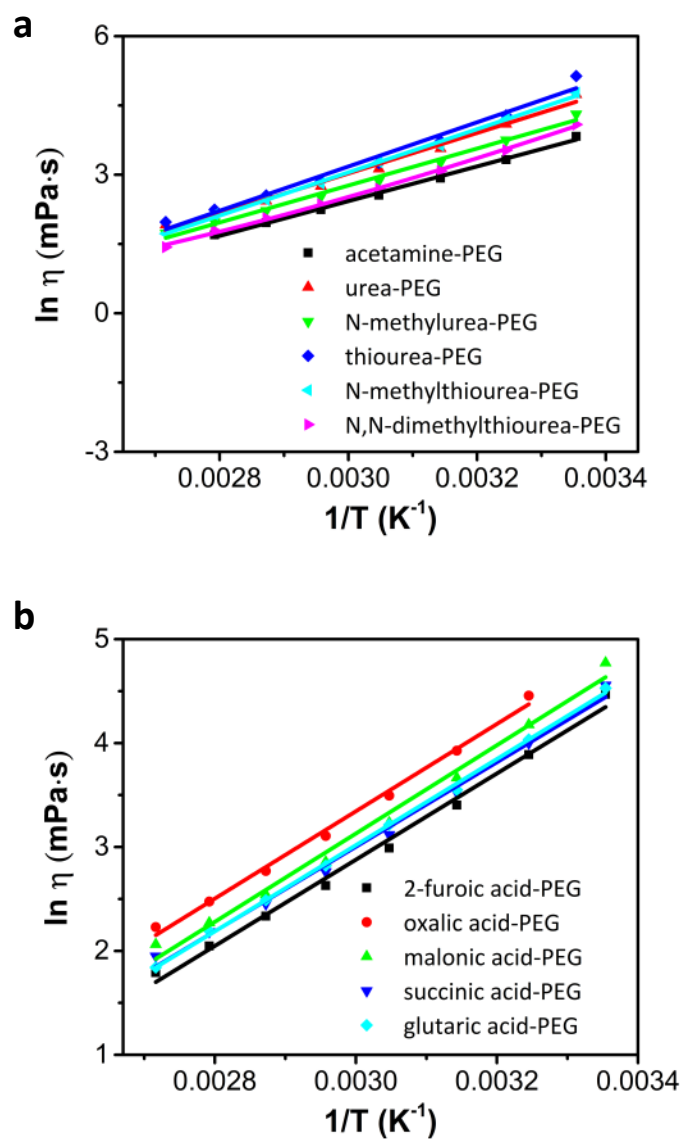

**Fig. S3** Plot of  $\ln$  viscosity vs. reciprocal of temperature for a variety of PQESs: (a) amides-based HBDs including acetamide, urea, N-methylurea, thiourea, N-methylthiourea, and N,N-dimethylthiourea; (b) carboxylic acid-based HBDs including 2-furoic acid, oxalic acid, malonic acid, succinic acid, and glutaric acid.

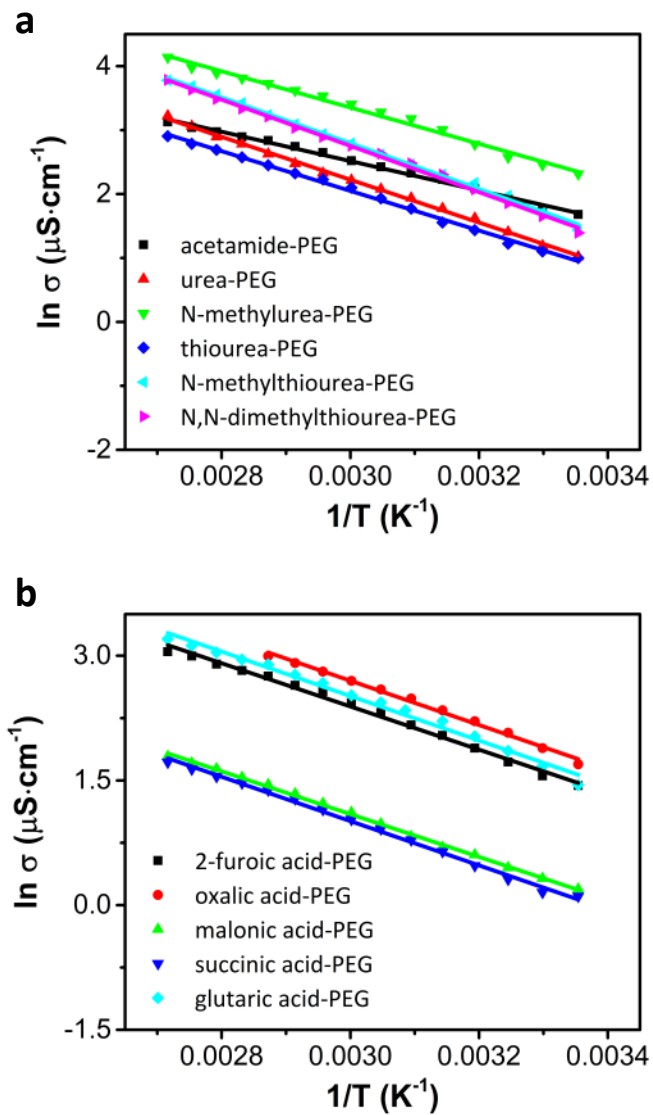

**Fig. S4** Plot of  $\ln$  conductivity vs. reciprocal of temperature for a variety of PQESs: (a) amides-based HBDs including acetamide, urea, N-methylurea, thiourea, N-methylthiourea, and N,N-dimethylthiourea; (b) carboxylic acid-based HBDs including 2-furoic acid, oxalic acid, malonic acid, succinic acid, and glutaric acid.

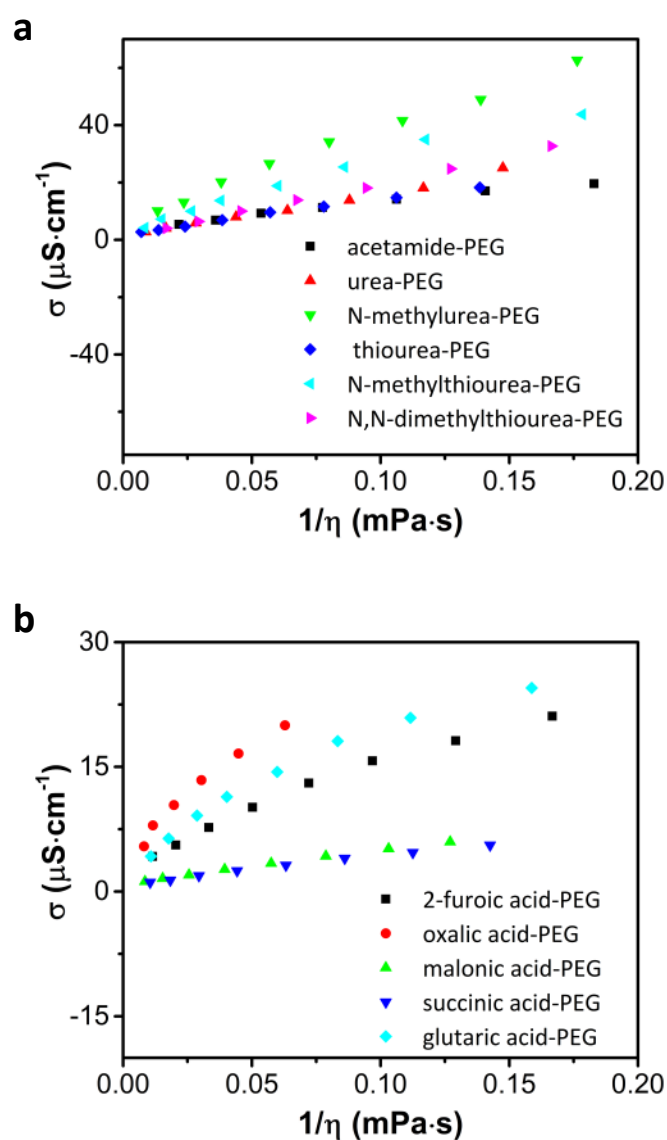

**Fig. S5** Plot of conductivity vs. reciprocal of viscosity for a variety of PQESs: (a) amides-based HBDs including acetamide, urea, N-methylurea, thiourea, N-methylthiourea, and N,N-dimethylthiourea; (b) carboxylic acid-based HBDs including 2-furoic acid, oxalic acid, malonic acid, succinic acid, and glutaric acid.



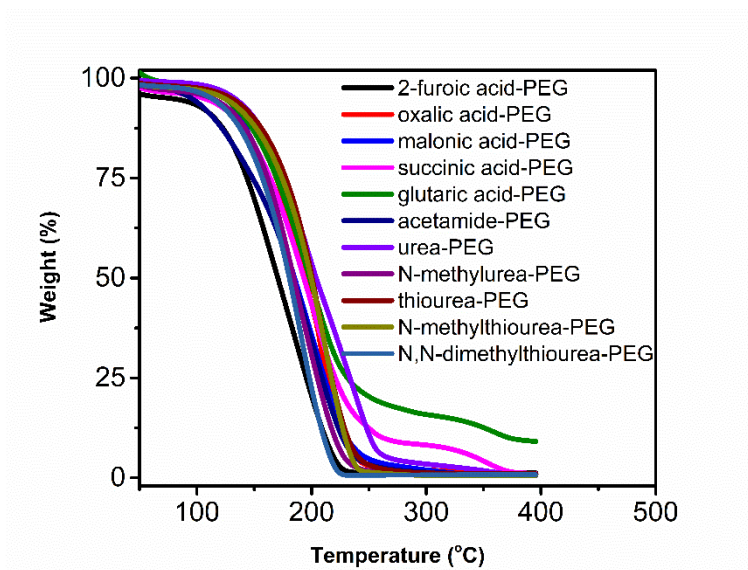

**Fig. S6** The thermal stability of the prepared PEG-based PQESs.

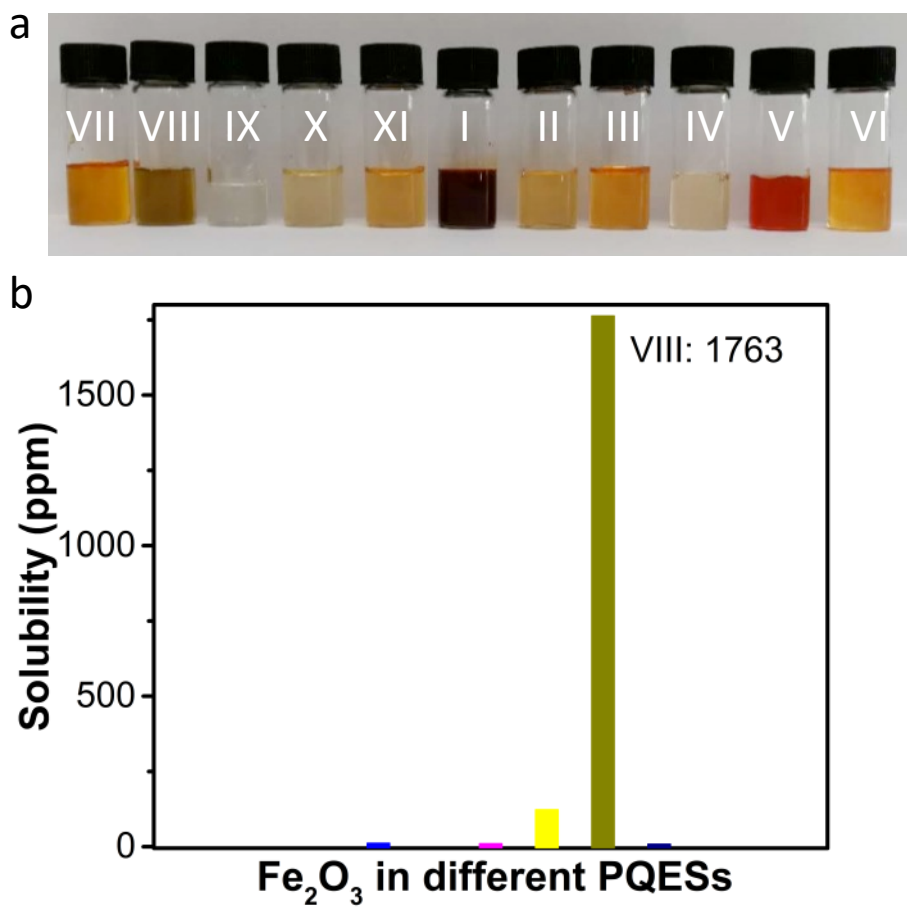

**Fig. S7 The dissolving of Fe<sub>2</sub>O<sub>3</sub> in the synthesized PQESs:** (a) Photographs of PQESs after dissolving Fe<sub>2</sub>O<sub>3</sub>; (b) solubility of Fe<sub>2</sub>O<sub>3</sub> in different PQESs. The HBDs were composed by acetamide (I), urea (II), N-methylurea (III), thiourea (IV), N-methylthiourea (V), and N,N-dimethylthiourea (VI), 2-furoic acid (VII), oxalic acid (VIII), malonic acid (IX), succinic acid (X), and glutaric acid (XI).

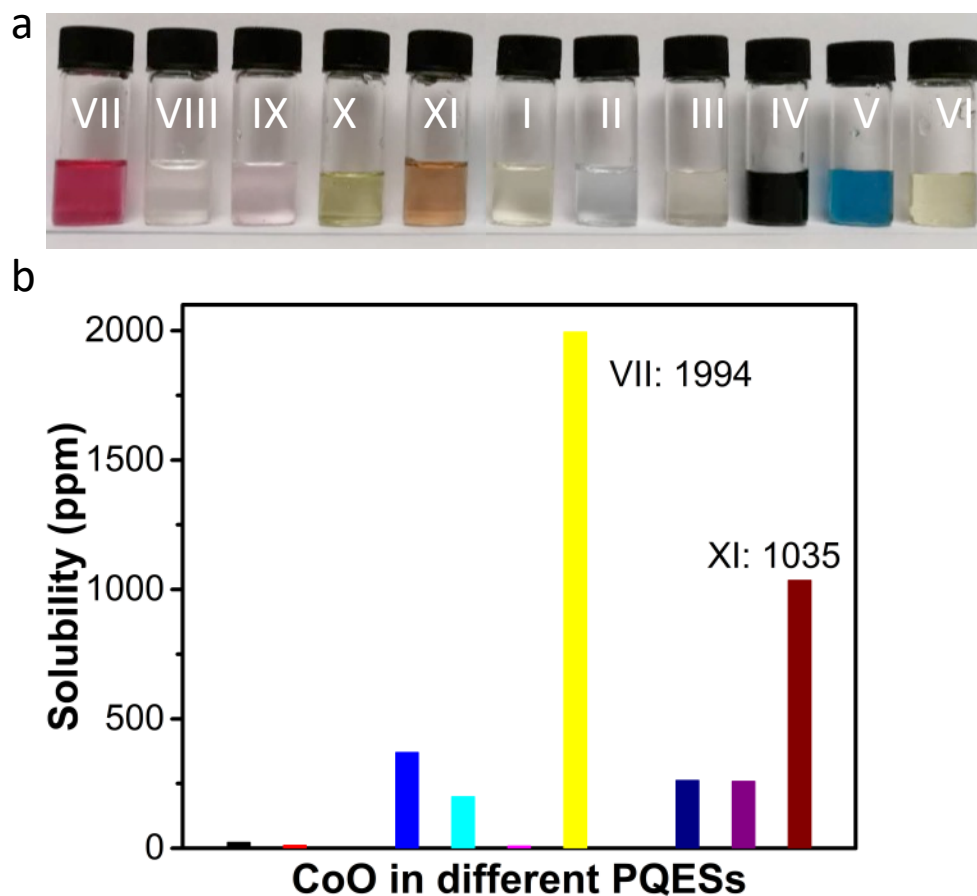

**Fig. S8** The dissolving of CoO in the synthesized PQESs: (a) Photographs of PQESs after dissolving CoO; (b) solubility of CoO in different PQESs. The HBDs were composed by acetamide (I), urea (II), N-methylurea (III), thiourea (IV), N-methylthiourea (V), and N,N-dimethylthiourea (VI), 2-furoic acid (VII), oxalic acid (VIII), malonic acid (IX), succinic acid (X), and glutaric acid (XI).

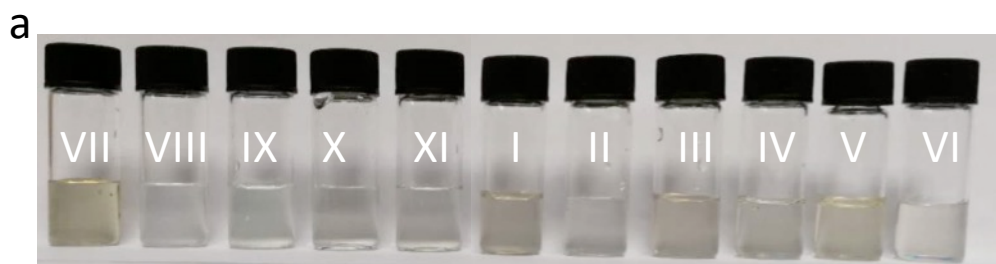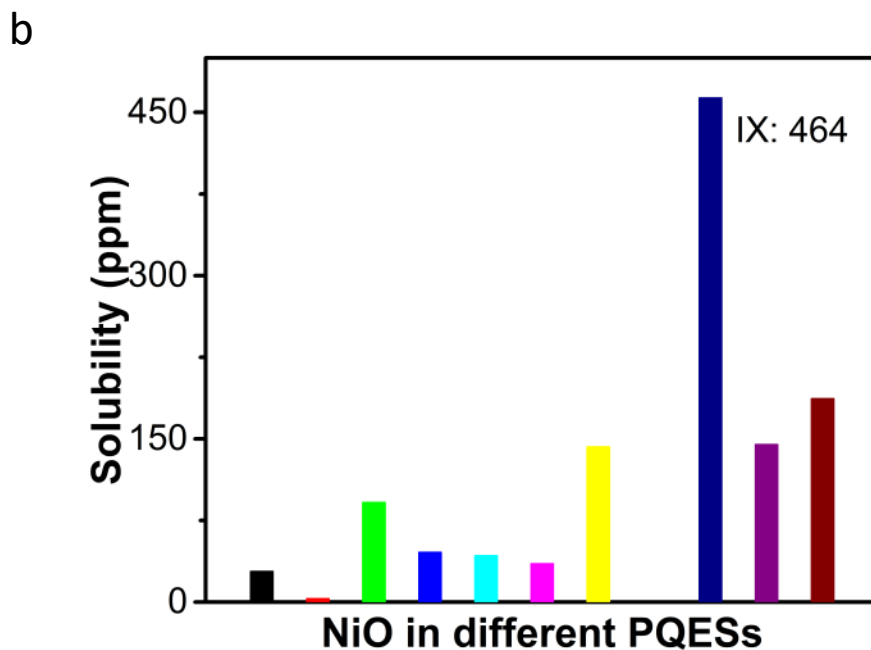

**Fig. S9 The dissolving of NiO in the synthesized PQESs:** (a) Photographs of PQESs after dissolving NiO; (b) solubility of NiO in different PQESs. The HBDs were composed by acetamide (I), urea (II), N-methylurea (III), thiourea (IV), N-methylthiourea (V), and N,N-dimethylthiourea (VI), 2-furoic acid (VII), oxalic acid (VIII), malonic acid (IX), succinic acid (X), and glutaric acid (XI).

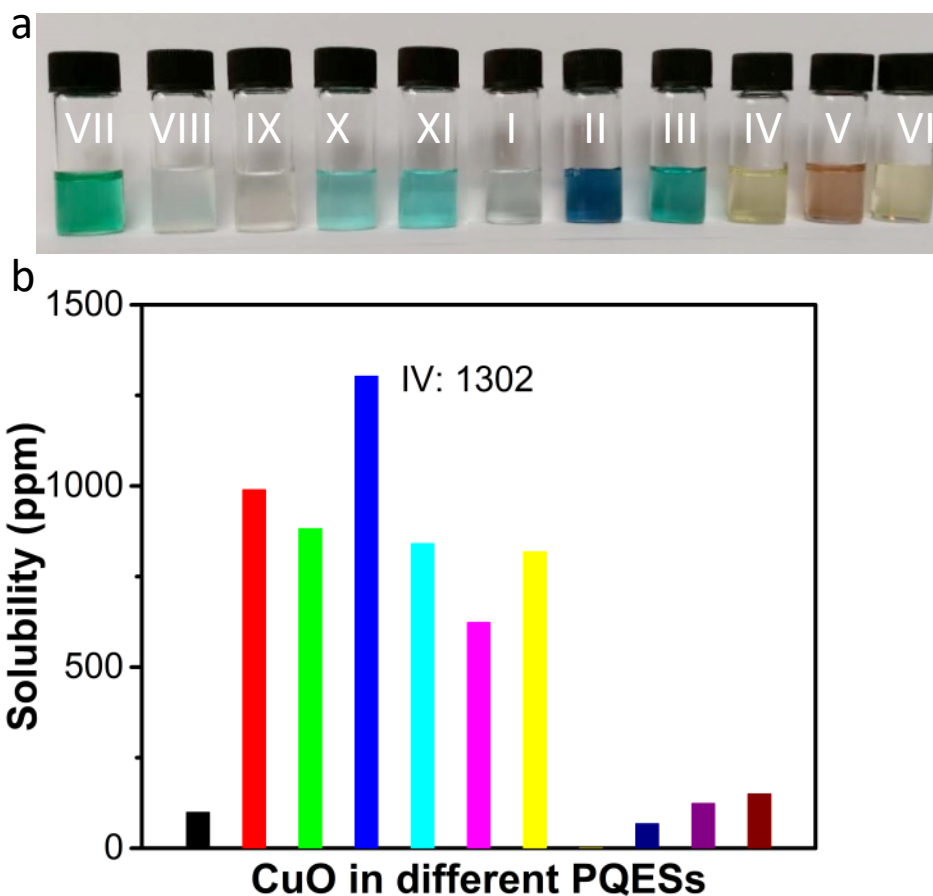

**Fig. S10** The dissolving of CuO in the synthesized PQESs: (a) Photographs of PQESs after dissolving CuO; (b) solubility of CuO in different PQESs. The HBDs were composed by acetamide (I), urea (II), N-methylurea (III), thiourea (IV), N-methylthiourea (V), and N,N-dimethylthiourea (VI), 2-furoic acid (VII), oxalic acid (VIII), malonic acid (IX), succinic acid (X), and glutaric acid (XI).

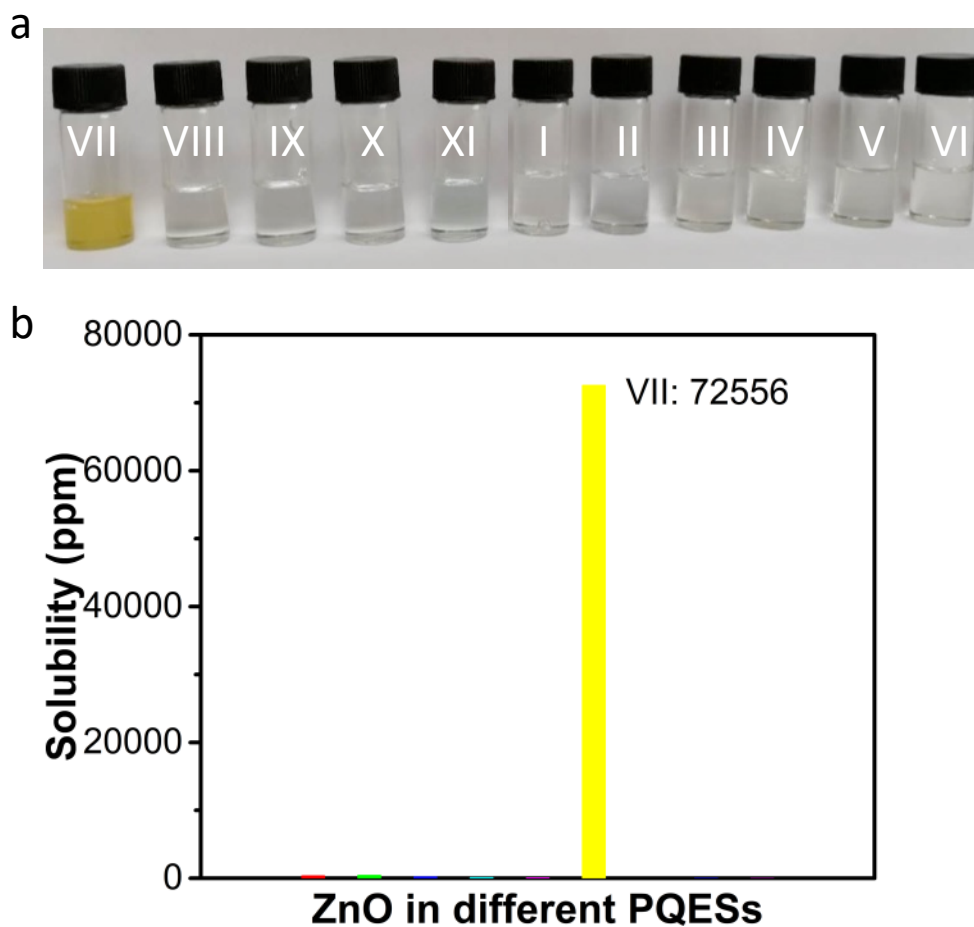

**Fig. S11** The dissolving of ZnO in the synthesized PQESs: (a) Photographs of PQESs after dissolving ZnO; (b) solubility of ZnO in different PQESs. The HBDs were composed by acetamide (I), urea (II), N-methylurea (III), thiourea (IV), N-methylthiourea (V), and N,N-dimethylthiourea (VI), 2-furoic acid (VII), oxalic acid (VIII), malonic acid (IX), succinic acid (X), and glutaric acid (XI).

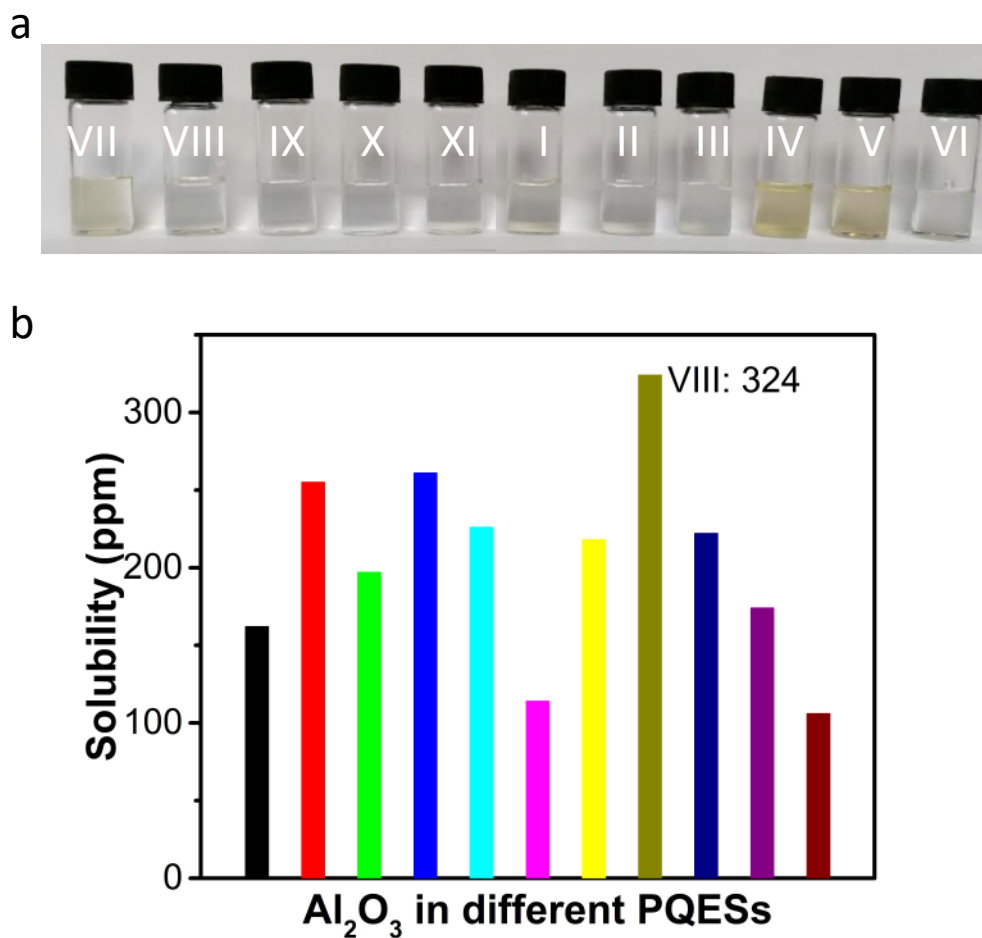

**Fig. S12 The dissolving of  $\text{Al}_2\text{O}_3$  in the synthesized PQESs:** (a) Photographs of PQESs after dissolving  $\text{Al}_2\text{O}_3$ ; (b) solubility of  $\text{Al}_2\text{O}_3$  in different PQESs. The HBDs were composed by acetamide (I), urea (II), N-methylurea (III), thiourea (IV), N-methylthiourea (V), and N,N-dimethylthiourea (VI), 2-furoic acid (VII), oxalic acid (VIII), malonic acid (IX), succinic acid (X), and glutaric acid (XI).

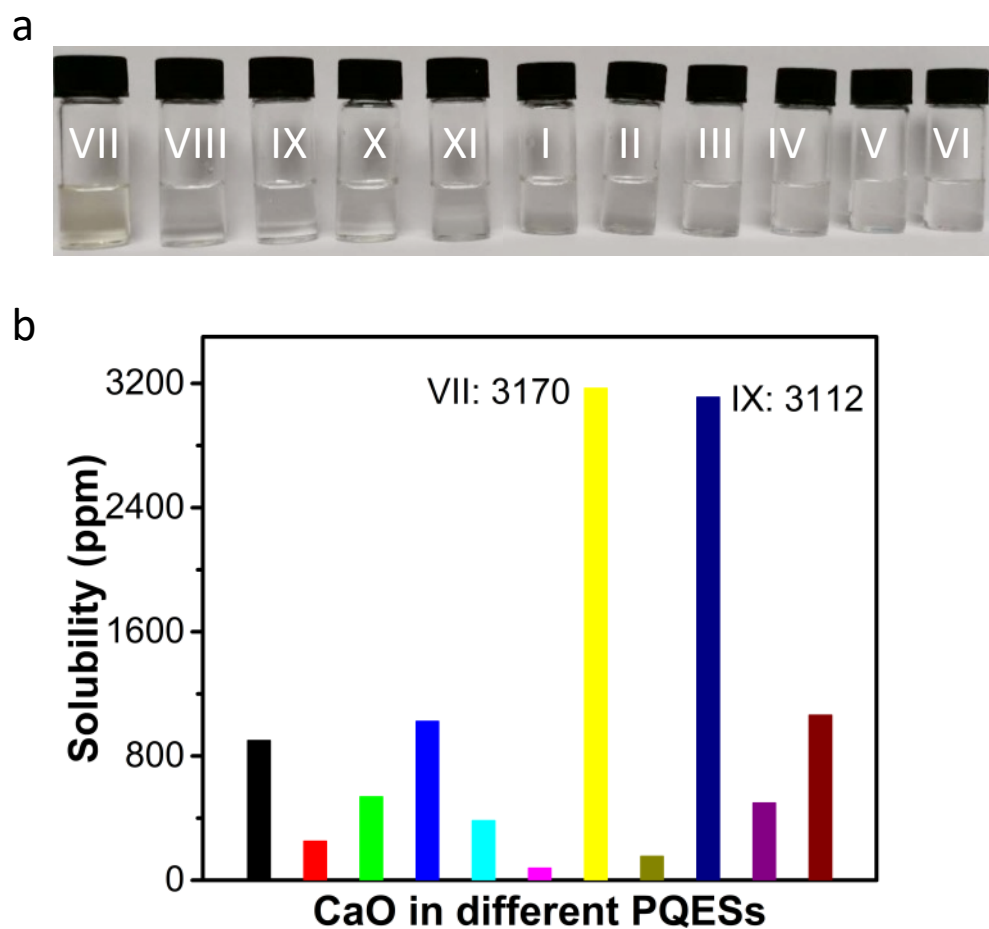

**Fig. S13** The dissolving of CaO in the synthesized PQESs: (a) Photographs of PQESs after dissolving CaO; (b) solubility of CaO in different PQESs. The HBDs were composed by acetamide (I), urea (II), N-methylurea (III), thiourea (IV), N-methylthiourea (V), and N,N-dimethylthiourea (VI), 2-furoic acid (VII), oxalic acid (VIII), malonic acid (IX), succinic acid (X), and glutaric acid (XI).



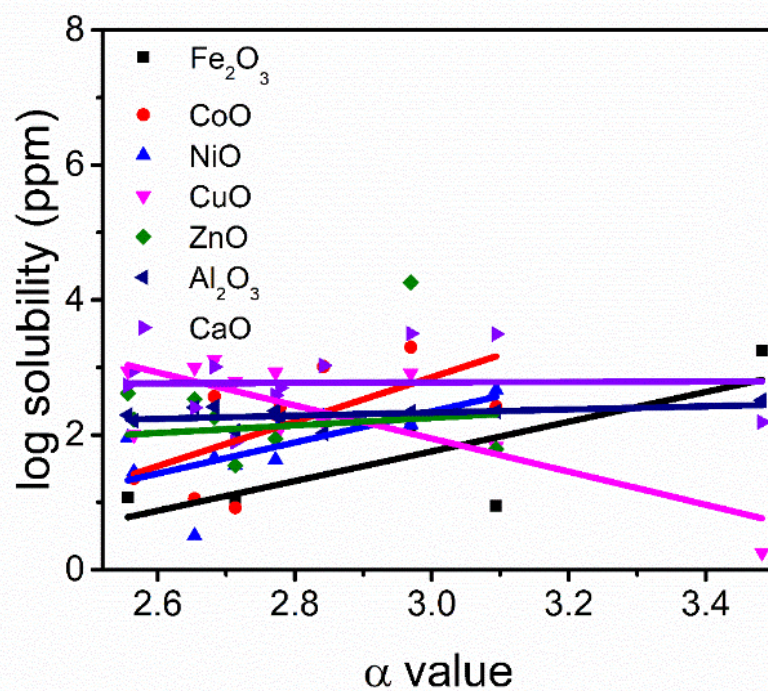

**Fig. S14** Relationship of metal oxides (Fe<sub>2</sub>O<sub>3</sub>, CoO, NiO, CuO, ZnO, Al<sub>2</sub>O<sub>3</sub>, and CaO) solubility vs  $\alpha$  value for PEG-based PQESs. The lines are the linear fitting results of the solubility vs  $\alpha$  value.

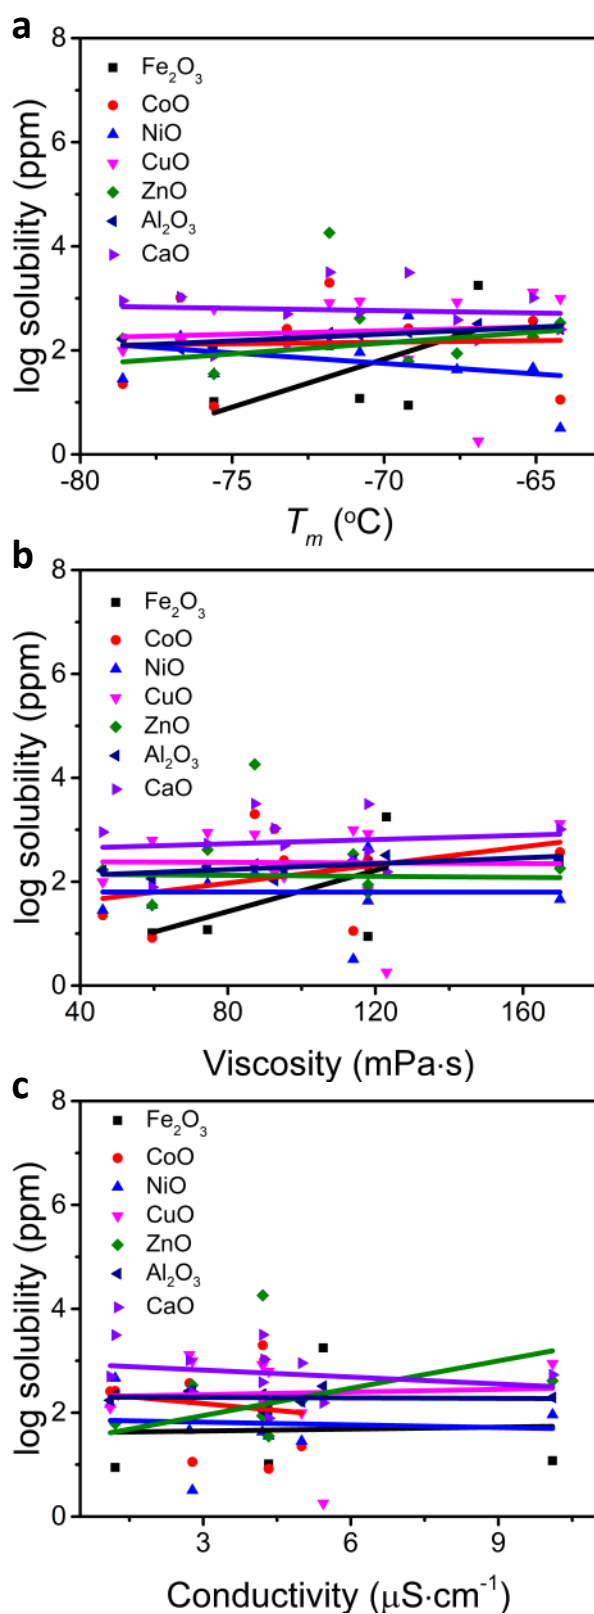

**Fig. S15** Relationship of metal oxides ( $\text{Fe}_2\text{O}_3$ , CoO, NiO, CuO, ZnO,  $\text{Al}_2\text{O}_3$ , and CaO) solubility vs  $T_m$  (a), viscosity (b), and conductivity (c) values for PEG-based PQESs. The lines are the linear fitting results of the solubility vs  $T_m$  (a), viscosity (b), and conductivity (c) values.

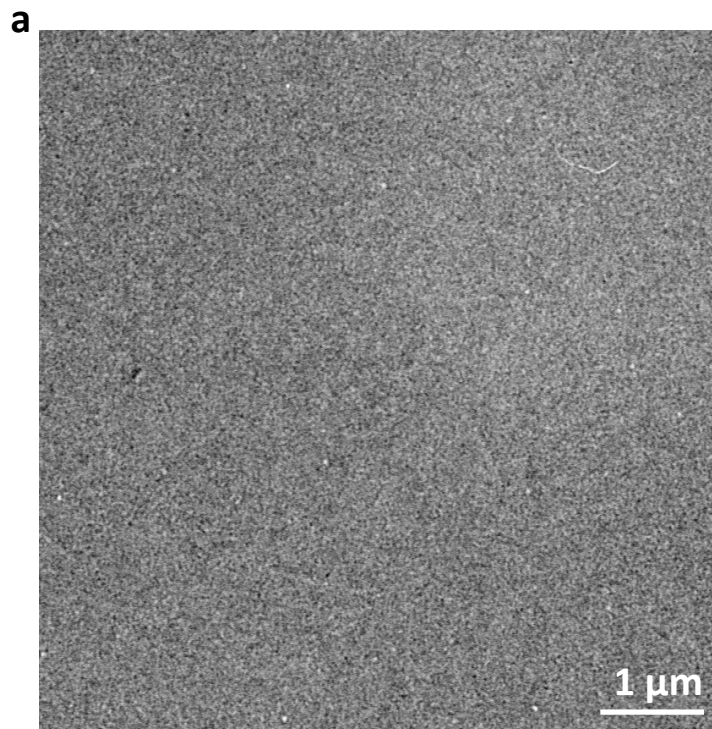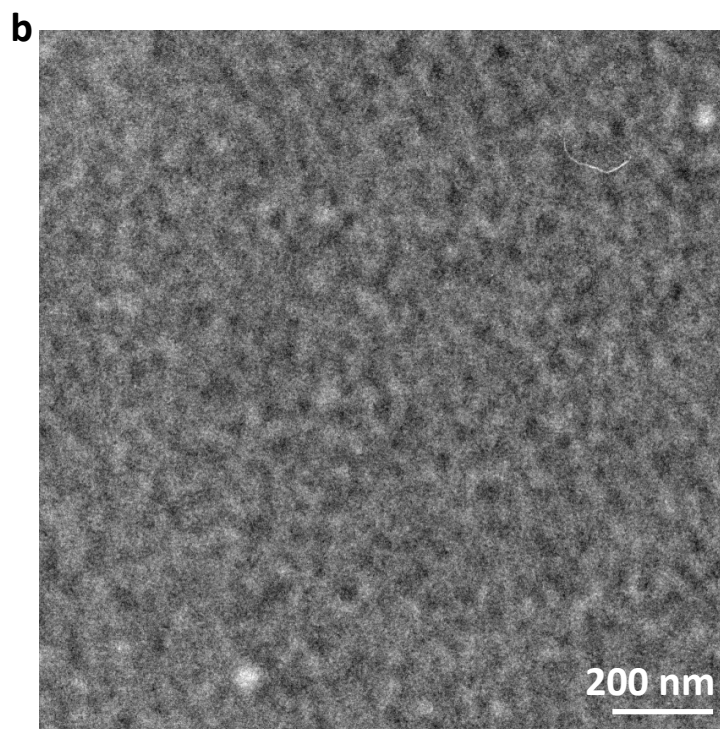

**Fig. 16** TEM images of ZnO dissolved in 2-furonic acid-PEG at low (a) and high (b) magnification.

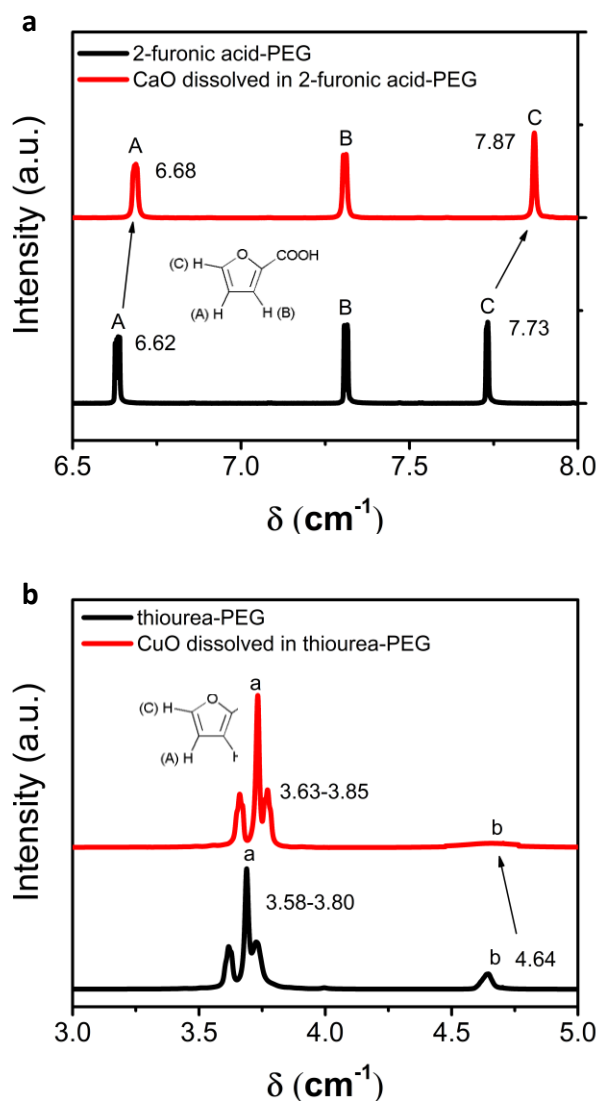

**Fig. S17**  $^1\text{H}$  NMR spectra of before (black) and after (red) metal oxides dissolved in the synthesized PQESs: (a) CaO in 2-furoic acid-PEG and (b) CuO in thiourea-PEG.

## Reference

1. J. Jiang, C. Yan, X. Zhao, H. Luo, Z. Xue, T. Mu, *Green Chem.*, 2017, **19**, 3023-3031.
2. A. P. Abbott, G. Capper, D. L. Davies, R. K. Rasheed and P. Shikotra, *Inorg. Chem.*, 2005, **44**, 6497-6499.
3. A. P. Abbott, G. Capper, D. L. Davies, K. J. McKenzie and S. U. Obi, *J. Chem. Eng. Data*, 2006, **51**, 1280-1282.
4. S. Wellens, T. Vander Hoogerstraete, C. Möller, B. Thijs, J. Luyten and K. Binnemans, *Hydrometallurgy*, 2014, **144-145**, 27-33.
5. S. Wellens, N. R. Brooks, B. Thijs, L. V. Meervelt and K. Binnemans, *Dalton Trans.*, 2014, **43**, 3443-3452.
